# Supplementary material for: Long-Term Outcome of Leptospirosis Infection with Acute Kidney Injury
Source: MDPI journal article supplement (doi:10.3390/biomedicines10102338), 2022-09-20
Supplement: s1 [file s1]

**Table S1.** ICD-9-CM code of comorbidities.

| <b>Comorbidities</b>                  | <b>ICD-9-CM Codes</b> |
|---------------------------------------|-----------------------|
| Diabetes mellitus                     | 250                   |
| Hypertension                          | 401-405               |
| Hyperlipidemia                        | 272.4                 |
| Gout                                  | 274                   |
| Chronic hepatitis                     | 070.32, 070.54        |
| Peripheral arterial occlusive disease | 443.9                 |
| Coronary artery disease               | 410-414               |
| Heart failure                         | 428                   |
| Stroke                                | 430-438               |
